# Supplementary material
Source: MDPI journal article supplement (https://www.mdpi.com/2073-4395/12/3/585)
Supplement: s1 [file s1]

**Supplementary Table S1.** The effect of the interaction between irrigation treatments and organic rates on the all studied traits in the studied seasons.

| Season                 |                       | <i>1<sup>st</sup> season 2018/2019</i> |                 |                 |                  |                 |                 | <i>2<sup>nd</sup> season 2019/2020</i> |                 |                 |                  |                 |                 |
|------------------------|-----------------------|----------------------------------------|-----------------|-----------------|------------------|-----------------|-----------------|----------------------------------------|-----------------|-----------------|------------------|-----------------|-----------------|
| Treatment              | Trait                 | TY <sub>1</sub>                        | GY <sub>1</sub> | SY <sub>1</sub> | TKW <sub>1</sub> | PH <sub>1</sub> | HI <sub>1</sub> | TY <sub>2</sub>                        | GY <sub>2</sub> | SY <sub>2</sub> | TKW <sub>2</sub> | PH <sub>2</sub> | HI <sub>2</sub> |
| <b>I<sub>1</sub></b>   | <b>O<sub>1</sub></b>  | 8.47                                   | 4.75            | 3.72            | 55.98            | 91.33           | 56.03           | 8.61                                   | 4.96            | 3.65            | 57.87            | 94.44           | 57.57           |
|                        | <b>O<sub>2</sub></b>  | 8.91                                   | 5.18            | 3.73            | 59.07            | 94.22           | 58.08           | 9.04                                   | 5.36            | 3.68            | 60.35            | 96.22           | 59.22           |
|                        | <b>O<sub>3</sub></b>  | 9.02                                   | 5.20            | 3.82            | 59.15            | 96.00           | 57.64           | 9.16                                   | 5.38            | 3.78            | 60.39            | 98.00           | 58.65           |
| <b>I<sub>2</sub></b>   | <b>O<sub>1</sub></b>  | 8.35                                   | 4.66            | 3.69            | 55.85            | 89.22           | 55.73           | 8.49                                   | 4.87            | 3.62            | 57.72            | 92.44           | 57.34           |
|                        | <b>O<sub>2</sub></b>  | 8.59                                   | 4.90            | 3.69            | 58.94            | 92.22           | 57.04           | 8.72                                   | 5.11            | 3.61            | 60.20            | 94.22           | 58.58           |
|                        | <b>O<sub>3</sub></b>  | 8.89                                   | 5.12            | 3.78            | 59.02            | 94.00           | 57.51           | 9.02                                   | 5.33            | 3.70            | 60.24            | 96.00           | 59.00           |
| <b>I<sub>3</sub></b>   | <b>O<sub>1</sub></b>  | 8.03                                   | 4.49            | 3.53            | 55.69            | 87.22           | 55.95           | 8.16                                   | 4.69            | 3.46            | 57.59            | 90.11           | 57.51           |
|                        | <b>O<sub>2</sub></b>  | 8.26                                   | 4.77            | 3.50            | 58.79            | 90.22           | 57.65           | 8.40                                   | 4.96            | 3.44            | 60.07            | 91.89           | 58.98           |
|                        | <b>O<sub>3</sub></b>  | 8.56                                   | 5.00            | 3.57            | 58.87            | 92.00           | 58.35           | 8.70                                   | 5.19            | 3.51            | 60.11            | 93.67           | 59.66           |
| <b>LSD (I*O)</b>       |                       | 0.045                                  | NS              | NS              | NS               | NS              | NS              | 0.050                                  | NS              | NS              | NS               | NS              | NS              |
| <b>I<sub>1</sub></b>   | <b>Zn<sub>1</sub></b> | 8.56                                   | 4.64            | 3.92            | 57.28            | 88.89           | 54.24           | 8.70                                   | 4.81            | 3.88            | 58.95            | 91.56           | 55.34           |
|                        | <b>Zn<sub>2</sub></b> | 8.83                                   | 5.13            | 3.70            | 57.98            | 86.78           | 58.13           | 8.96                                   | 5.31            | 3.65            | 59.46            | 97.44           | 59.22           |
|                        | <b>Zn<sub>3</sub></b> | 9.01                                   | 5.35            | 3.66            | 58.94            | 84.78           | 59.37           | 9.15                                   | 5.57            | 3.58            | 60.19            | 99.67           | 60.89           |
| <b>I<sub>2</sub></b>   | <b>Zn<sub>1</sub></b> | 8.40                                   | 4.53            | 3.87            | 57.15            | 94.89           | 53.91           | 8.53                                   | 4.70            | 3.83            | 58.80            | 89.22           | 55.17           |
|                        | <b>Zn<sub>2</sub></b> | 8.64                                   | 4.94            | 3.70            | 57.85            | 92.89           | 57.17           | 8.77                                   | 5.05            | 3.72            | 59.31            | 95.44           | 57.59           |
|                        | <b>Zn<sub>3</sub></b> | 8.80                                   | 5.21            | 3.59            | 58.81            | 90.89           | 59.20           | 8.93                                   | 5.55            | 3.38            | 60.04            | 98.00           | 62.16           |
| <b>I<sub>3</sub></b>   | <b>Zn<sub>1</sub></b> | 8.07                                   | 4.38            | 3.69            | 56.99            | 97.78           | 54.28           | 8.20                                   | 4.55            | 3.65            | 58.65            | 86.89           | 55.49           |
|                        | <b>Zn<sub>2</sub></b> | 8.31                                   | 4.80            | 3.51            | 57.70            | 95.78           | 57.78           | 8.45                                   | 4.90            | 3.55            | 59.19            | 93.11           | 57.99           |
|                        | <b>Zn<sub>3</sub></b> | 8.47                                   | 5.07            | 3.40            | 58.66            | 93.78           | 59.88           | 8.61                                   | 5.39            | 3.21            | 59.92            | 95.67           | 62.67           |
| <b>LSD (I*Nano-Zn)</b> |                       | NS                                     | NS              | NS              | NS               | NS              | NS              | NS                                     | NS              | NS              | NS               | NS              | NS              |
| <b>O<sub>1</sub></b>   | <b>Zn<sub>1</sub></b> | 8.08                                   | 4.20            | 3.87            | 54.88            | 80.44           | 52.07           | 8.21                                   | 4.38            | 3.83            | 57.24            | 84.00           | 53.44           |
|                        | <b>Zn<sub>2</sub></b> | 8.31                                   | 4.70            | 3.62            | 54.98            | 92.67           | 56.48           | 8.45                                   | 4.80            | 3.65            | 56.57            | 95.56           | 56.83           |
|                        | <b>Zn<sub>3</sub></b> | 8.45                                   | 5.00            | 3.45            | 57.66            | 94.67           | 59.14           | 8.59                                   | 5.34            | 3.25            | 59.36            | 97.44           | 62.15           |
| <b>O<sub>2</sub></b>   | <b>Zn<sub>1</sub></b> | 8.36                                   | 4.57            | 3.79            | 58.64            | 89.67           | 54.69           | 8.49                                   | 4.73            | 3.76            | 59.89            | 91.33           | 55.73           |
|                        | <b>Zn<sub>2</sub></b> | 8.60                                   | 5.04            | 3.57            | 59.02            | 91.67           | 58.52           | 8.73                                   | 5.19            | 3.54            | 60.41            | 93.89           | 59.40           |
|                        | <b>Zn<sub>3</sub></b> | 8.81                                   | 5.25            | 3.57            | 59.14            | 95.33           | 59.56           | 8.94                                   | 5.51            | 3.43            | 60.31            | 97.11           | 61.65           |
| <b>O<sub>3</sub></b>   | <b>Zn<sub>1</sub></b> | 8.59                                   | 4.78            | 3.81            | 57.90            | 90.33           | 55.66           | 8.72                                   | 4.95            | 3.77            | 59.27            | 92.33           | 56.83           |
|                        | <b>Zn<sub>2</sub></b> | 8.86                                   | 5.15            | 3.72            | 59.53            | 94.33           | 58.08           | 9.00                                   | 5.27            | 3.73            | 61.00            | 96.56           | 58.57           |
|                        | <b>Zn<sub>3</sub></b> | 9.02                                   | 5.39            | 3.63            | 59.62            | 97.33           | 59.76           | 9.16                                   | 5.67            | 3.49            | 60.47            | 98.78           | 61.92           |
| <b>LSD (O*Nano-Zn)</b> |                       | NS                                     | NS              | NS              | 0.902            | 1.502           | NS              | NS                                     | NS              | NS              | 1.025            | 2.106           | NS              |

Abbreviations: Biological yield ( BY) ton ha<sup>-1</sup> (TY), grain yield ton ha<sup>-1</sup> (GY), straw yield ton ha<sup>-1</sup> (SY), 1000-kernels weight g (TKW), plant height cm (PH), and harvest index% (HI)

**Supplementary Table S2:** Effect of the interaction between different organic amendments and nano-Zn foliar spraying concentrations under irrigation supplements on all barley studied traits in 2018/19 and 2019/20 seasons.

| Season             |                | 1 <sup>st</sup> season, 2018/2019 |                 |                 |                  |                 |                 |                 | 2 <sup>nd</sup> season, 2019/2020 |                 |                  |                 |                 |       |  |
|--------------------|----------------|-----------------------------------|-----------------|-----------------|------------------|-----------------|-----------------|-----------------|-----------------------------------|-----------------|------------------|-----------------|-----------------|-------|--|
| Trait Treatment    |                | BY <sub>1</sub>                   | GY <sub>1</sub> | SY <sub>1</sub> | TKW <sub>1</sub> | PH <sub>1</sub> | HI <sub>1</sub> | BY <sub>2</sub> | GY <sub>2</sub>                   | SY <sub>2</sub> | TKW <sub>2</sub> | PH <sub>2</sub> | HI <sub>2</sub> |       |  |
| I <sub>1</sub>     | O <sub>1</sub> | Zn <sub>1</sub>                   | 8.27            | 4.33            | 3.94             | 55.02           | 82.67           | 52.37           | 8.41                              | 4.51            | 3.90             | 57.40           | 86.33           | 53.67 |  |
|                    |                | Zn <sub>2</sub>                   | 8.48            | 4.80            | 3.68             | 55.12           | 94.67           | 56.64           | 8.62                              | 4.92            | 3.71             | 56.70           | 97.67           | 57.02 |  |
|                    |                | Zn <sub>3</sub>                   | 8.65            | 5.11            | 3.54             | 57.8            | 96.67           | 59.07           | 8.79                              | 5.45            | 3.34             | 59.51           | 99.33           | 62.03 |  |
|                    | O <sub>2</sub> | Zn <sub>1</sub>                   | 8.62            | 4.76            | 3.86             | 58.77           | 91.67           | 55.24           | 8.76                              | 4.91            | 3.85             | 60.04           | 93.67           | 56.02 |  |
|                    |                | Zn <sub>2</sub>                   | 8.96            | 5.34            | 3.62             | 59.16           | 93.67           | 59.65           | 9.08                              | 5.60            | 3.48             | 60.55           | 96.00           | 61.67 |  |
|                    |                | Zn <sub>3</sub>                   | 9.16            | 5.43            | 3.73             | 59.27           | 97.33           | 59.35           | 9.29                              | 5.57            | 3.72             | 60.45           | 99.00           | 59.98 |  |
|                    | O <sub>3</sub> | Zn <sub>1</sub>                   | 8.78            | 4.83            | 3.94             | 58.04           | 92.33           | 55.09           | 8.92                              | 5.02            | 3.90             | 59.42           | 94.67           | 56.32 |  |
|                    |                | Zn <sub>2</sub>                   | 9.05            | 5.26            | 3.79             | 59.66           | 96.33           | 58.11           | 9.18                              | 5.41            | 3.77             | 61.13           | 98.67           | 58.98 |  |
|                    |                | Zn <sub>3</sub>                   | 9.24            | 5.52            | 3.73             | 59.76           | 99.33           | 59.70           | 9.38                              | 5.69            | 3.69             | 60.62           | 100.67          | 60.66 |  |
|                    | O <sub>1</sub> | Zn <sub>1</sub>                   | 8.14            | 4.23            | 3.91             | 54.89           | 80.33           | 52.02           | 8.28                              | 4.41            | 3.87             | 57.24           | 84.00           | 53.35 |  |
|                    |                | Zn <sub>2</sub>                   | 8.39            | 4.72            | 3.68             | 54.99           | 92.67           | 56.19           | 8.53                              | 4.83            | 3.70             | 56.56           | 95.67           | 56.65 |  |
|                    |                | Zn <sub>3</sub>                   | 8.52            | 5.02            | 3.50             | 57.66           | 94.67           | 58.96           | 8.65                              | 5.37            | 3.29             | 59.35           | 97.67           | 62.03 |  |
| O <sub>2</sub>     |                | Zn <sub>1</sub>                   | 8.39            | 4.54            | 3.85             | 58.65           | 89.67           | 54.12           | 8.52                              | 4.71            | 3.81             | 59.89           | 91.33           | 55.37 |  |
|                    |                | Zn <sub>2</sub>                   | 8.59            | 4.95            | 3.63             | 59.02           | 91.67           | 57.68           | 8.72                              | 5.07            | 3.65             | 60.39           | 94.00           | 58.10 |  |
|                    |                | Zn <sub>3</sub>                   | 8.80            | 5.22            | 3.58             | 59.14           | 95.33           | 59.32           | 8.93                              | 5.56            | 3.37             | 60.31           | 97.33           | 62.27 |  |
| I <sub>2</sub>     | O <sub>3</sub> | Zn <sub>1</sub>                   | 8.66            | 4.81            | 3.85             | 57.90           | 90.33           | 55.59           | 8.79                              | 4.99            | 3.80             | 59.27           | 92.33           | 56.78 |  |
|                    |                | Zn <sub>2</sub>                   | 8.94            | 5.15            | 3.79             | 59.53           | 94.33           | 57.62           | 9.07                              | 5.26            | 3.81             | 60.99           | 96.67           | 58.03 |  |
|                    |                | Zn <sub>3</sub>                   | 9.08            | 5.39            | 3.69             | 59.62           | 97.33           | 59.33           | 9.21                              | 5.73            | 3.48             | 60.46           | 99.00           | 62.19 |  |
|                    | O <sub>1</sub> | Zn <sub>1</sub>                   | 7.82            | 4.05            | 3.77             | 54.73           | 78.33           | 51.82           | 7.95                              | 4.23            | 3.72             | 57.09           | 81.67           | 53.30 |  |
|                    |                | Zn <sub>2</sub>                   | 8.07            | 4.57            | 3.50             | 54.84           | 90.67           | 56.62           | 8.20                              | 4.66            | 3.54             | 56.44           | 93.33           | 56.84 |  |
|                    |                | Zn <sub>3</sub>                   | 8.19            | 4.87            | 3.33             | 57.51           | 92.67           | 59.40           | 8.33                              | 5.19            | 3.13             | 59.23           | 95.33           | 62.39 |  |
|                    | O <sub>2</sub> | Zn <sub>1</sub>                   | 8.06            | 4.41            | 3.65             | 58.49           | 87.67           | 54.72           | 8.19                              | 4.57            | 3.63             | 59.74           | 89.00           | 55.81 |  |
|                    |                | Zn <sub>2</sub>                   | 8.26            | 4.81            | 3.45             | 58.88           | 89.67           | 58.23           | 8.39                              | 4.90            | 3.49             | 60.27           | 91.67           | 58.42 |  |
|                    |                | Zn <sub>3</sub>                   | 8.47            | 5.08            | 3.39             | 59.00           | 93.33           | 60.00           | 8.61                              | 5.40            | 3.21             | 60.19           | 95.00           | 62.7  |  |
|                    | O <sub>3</sub> | Zn <sub>1</sub>                   | 8.33            | 4.69            | 3.64             | 57.74           | 88.33           | 56.30           | 8.46                              | 4.85            | 3.61             | 59.12           | 90.00           | 57.38 |  |
|                    |                | Zn <sub>2</sub>                   | 8.61            | 5.04            | 3.57             | 59.39           | 92.33           | 58.49           | 8.74                              | 5.13            | 3.61             | 60.87           | 94.33           | 58.71 |  |
|                    |                | Zn <sub>3</sub>                   | 8.75            | 5.27            | 3.48             | 59.47           | 95.33           | 60.25           | 8.89                              | 5.59            | 3.3              | 60.34           | 96.67           | 62.91 |  |
| LSD (I*O *Nano-Zn) |                | NS                                | NS              | NS              | NS               | NS              | NS              | NS              | NS                                | NS              | NS               | NS              | NS              |       |  |

Abbreviations: Biological yield ( BY) ton ha<sup>-1</sup> (TY), grain yield ton ha<sup>-1</sup> (GY), straw yield ton ha<sup>-1</sup> (SY), 1000-kernels weight g (TKW), plant height cm (PH), and harvest index% (HI).

**Supplementary Figure S1:** Total water applied, Stored water, Water application efficiency, and Irrigation water productivity for grain and straw (PIW, kg m<sup>-3</sup>) as affected by different treatments (irrigation supplements, organic amendments, and nano-Zn foliar spraying).

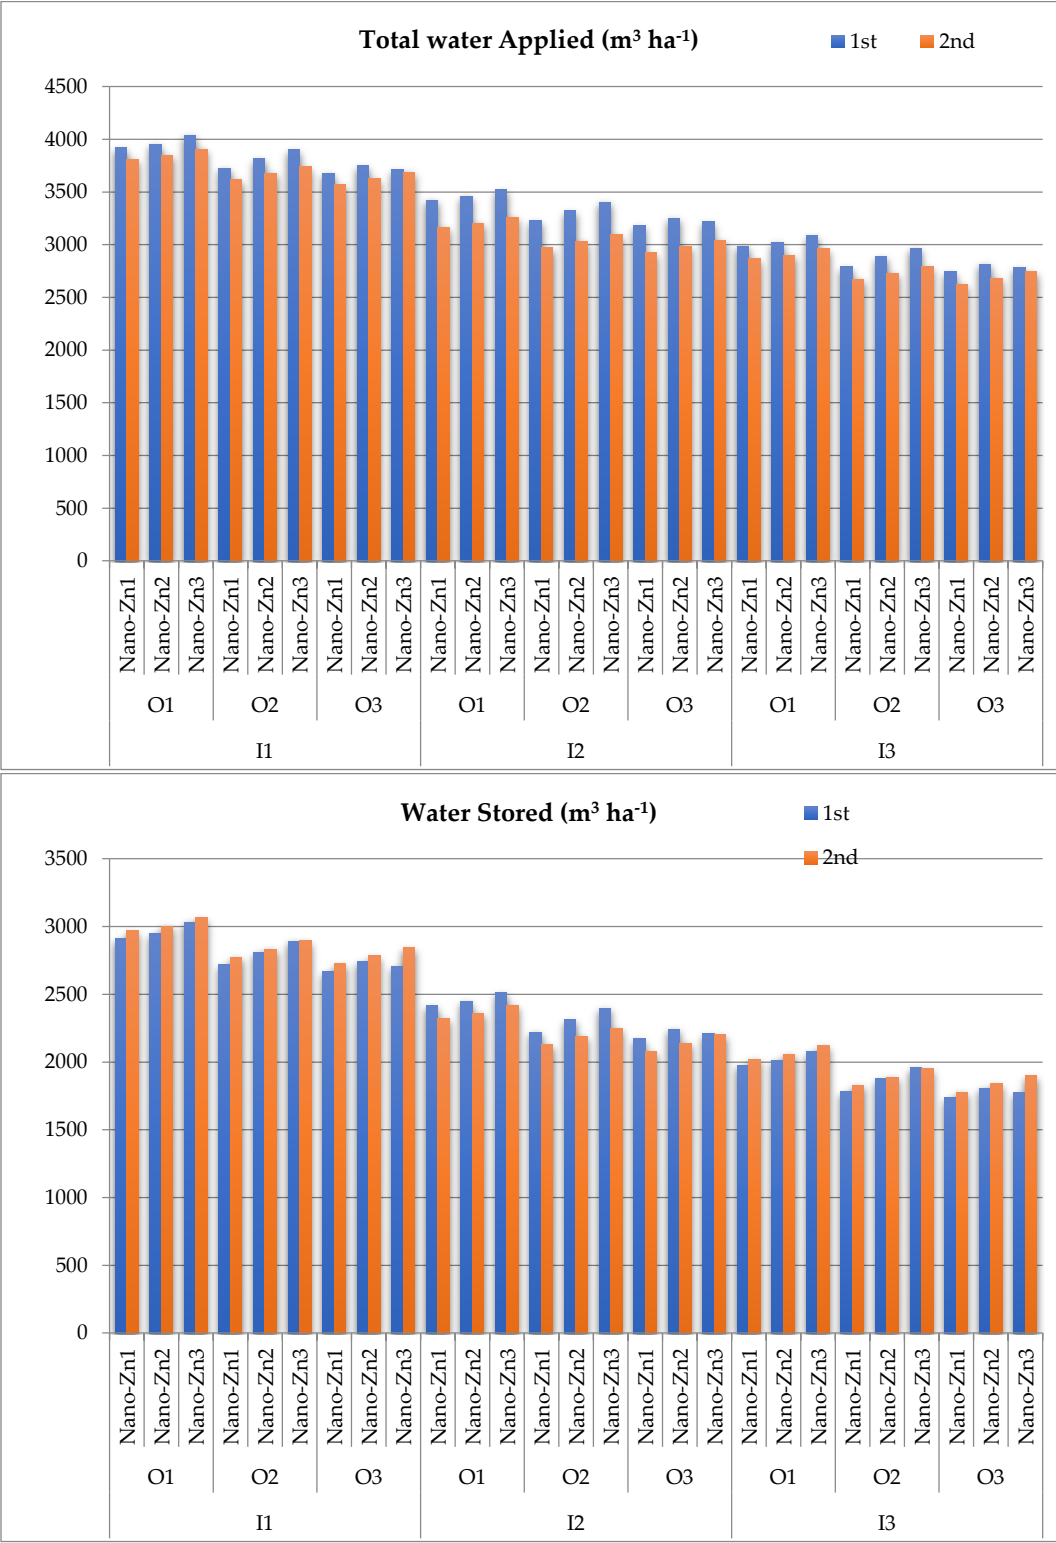

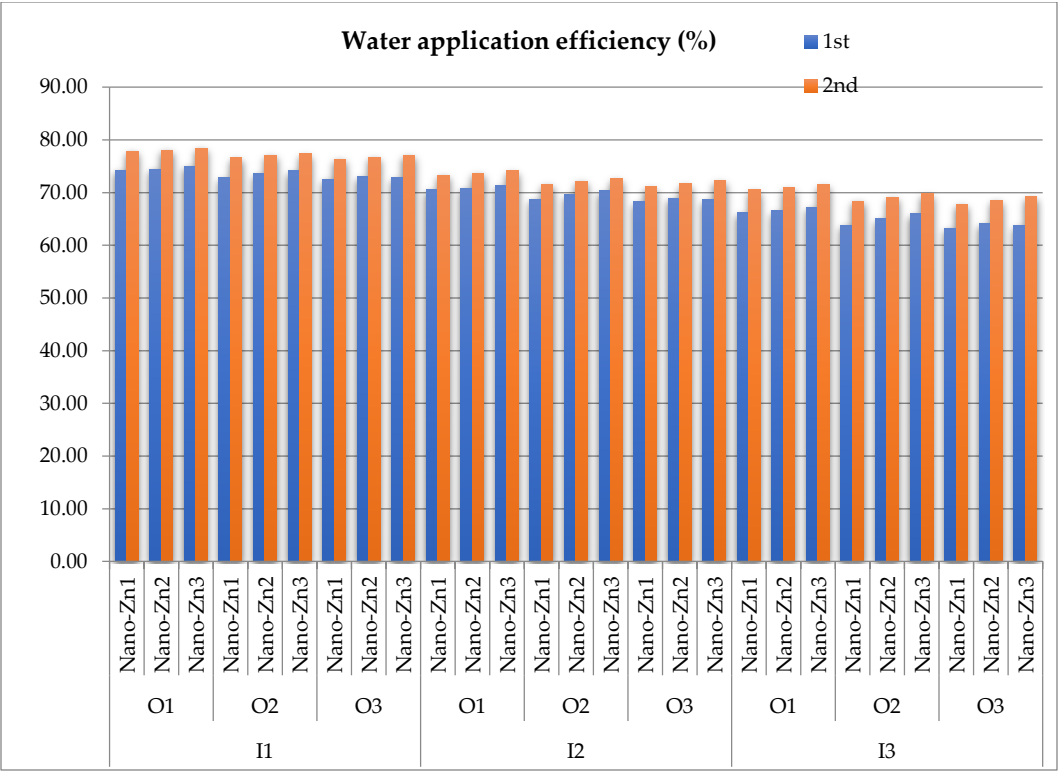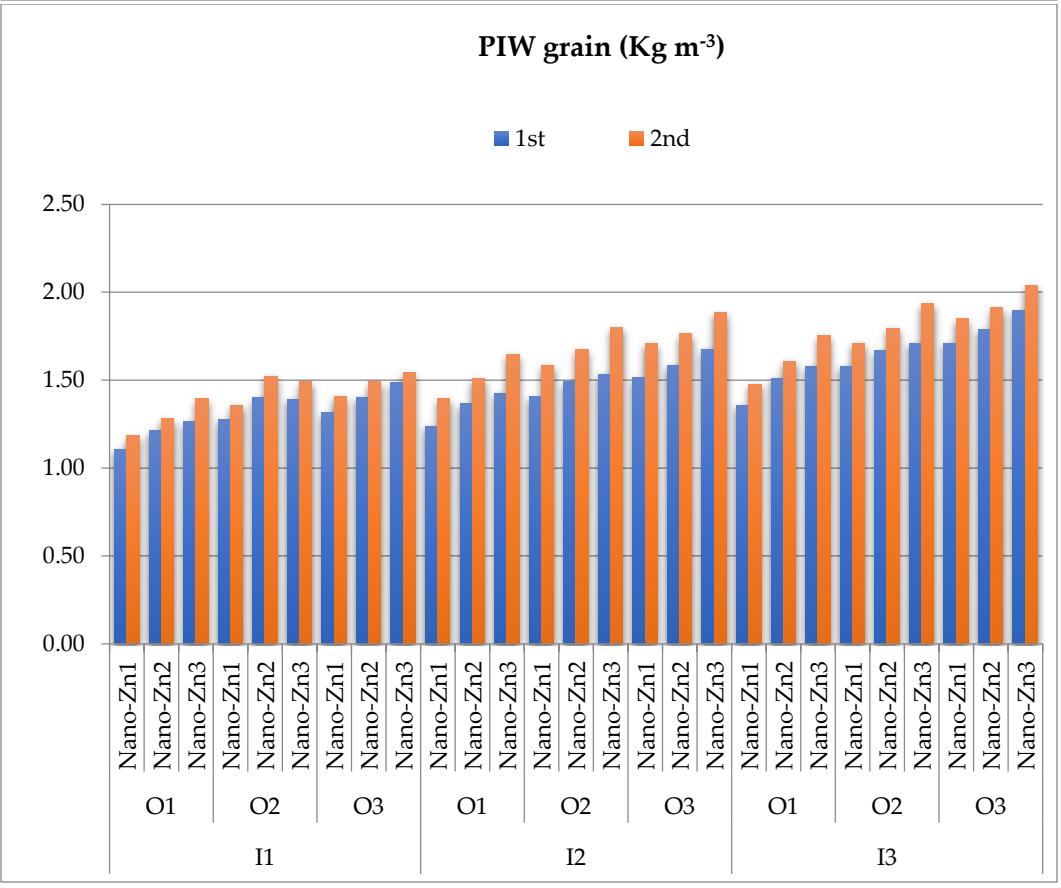

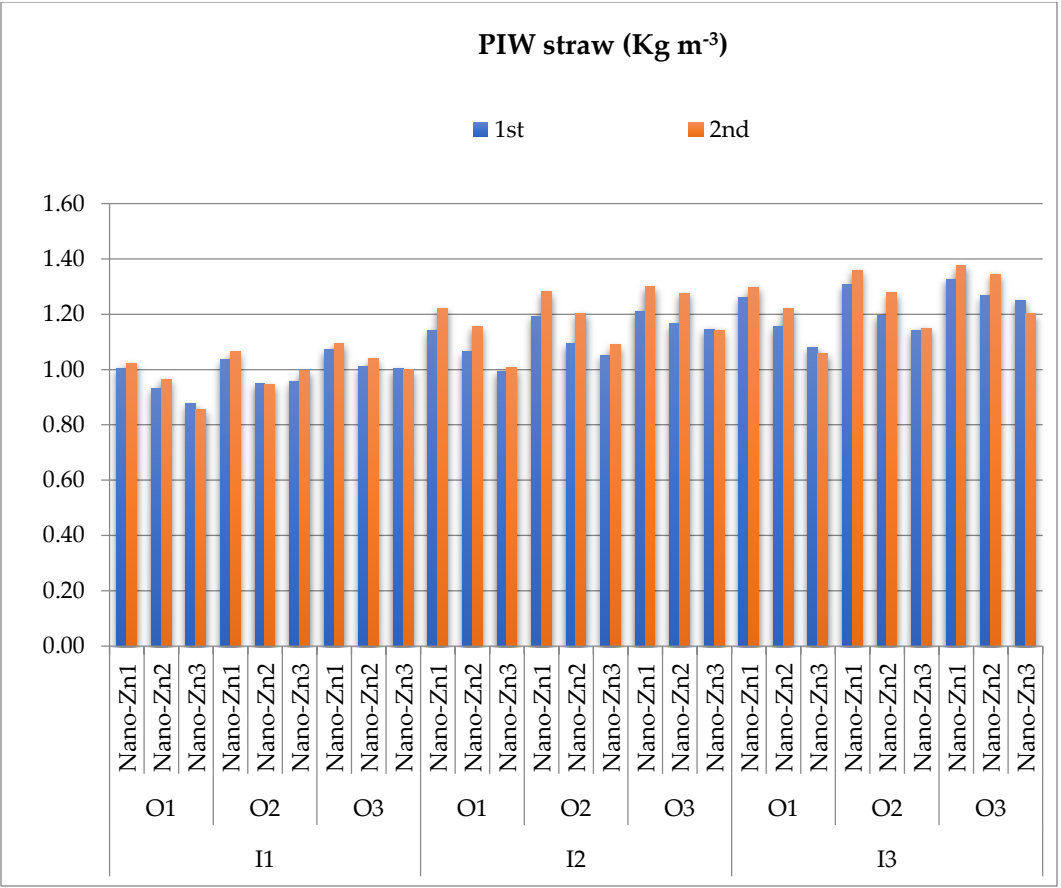

**Irrigation supplements \* Organic amendments \* Nano-Zn foliar spraying**
